# Supplementary material for: Activation of GCN2/ATF4 signals in amygdalar PKC-δ neurons promotes WAT browning under leucine deprivation
Source: PubMed Central journal article supplement (PMC7275074; doi:10.1038/s41467-020-16662-2), 2020-06-05
Supplement: 41467_2020_16662_MOESM1_ESM.pdf [file 41467_2020_16662_MOESM1_ESM.pdf]

**Activation of GCN2/ATF4 signals in amygdalar PKC- $\delta$  neurons promotes WAT  
browning under leucine deprivation**

Feixiang Yuan<sup>1</sup>, Haizhou Jiang<sup>1</sup>, Hanrui Yin<sup>1</sup>, Xiaoxue Jiang<sup>1</sup>, Fuxin Jiao<sup>1</sup>, Shanghai  
Chen<sup>1</sup>, Hao Ying<sup>1</sup>, Yan Chen<sup>1</sup>, Qiwei Zhai<sup>1</sup> and Feifan Guo<sup>1#</sup>

<sup>1</sup>CAS Key Laboratory of Nutrition, Metabolism and Food safety, Shanghai Institute of  
Nutrition and Health, Shanghai Institutes for Biological Sciences, University of  
Chinese Academy of Sciences, Chinese Academy of Sciences

<sup>#</sup>Correspondence should be addressed to Feifan Guo; E-mail: ffguo@sibs.ac.cn;

Address: 320 Yueyang Road, Shanghai, China 200031

## Supplementary Figure Legends and Tables

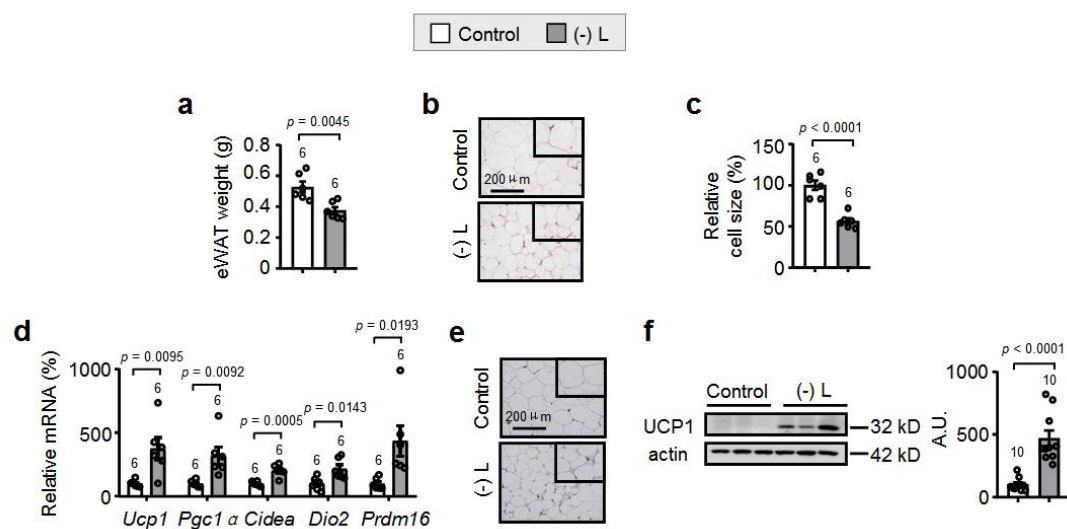

### Supplementary Figure 1. Metabolic parameters related to leucine deprivation. **a**

Epididymal WAT (eWAT) weight. **b** Representative images of hematoxylin and eosin

(H&E) staining of eWAT. **c** eWAT cell size quantified by Image J analysis of H&E

images. **d** Gene expression of *Ucp1*, *Pgc1 $\alpha$* , *Cidea*, *Dio2* and *Prdm16* in eWAT by

RT-PCR. **e** Representative images of immunohistochemistry (IHC) of UCP1 in

eWAT. **f** UCP1 protein in eWAT by western blotting (left) and quantified by

densitometric analysis (right), A.U.: arbitrary units. Studies were conducted using 14-

to 15-week-old male wild-type mice fed a control (Control) or leucine-deficient [(-) L]

diet for 3 days. Data are expressed as the mean  $\pm$  SEM (n represents number of

samples and are indicated above the bar graph), with individual data points. Data were

analyzed by two-tailed unpaired Student's t test. Source data are provided as a Source

Data file.

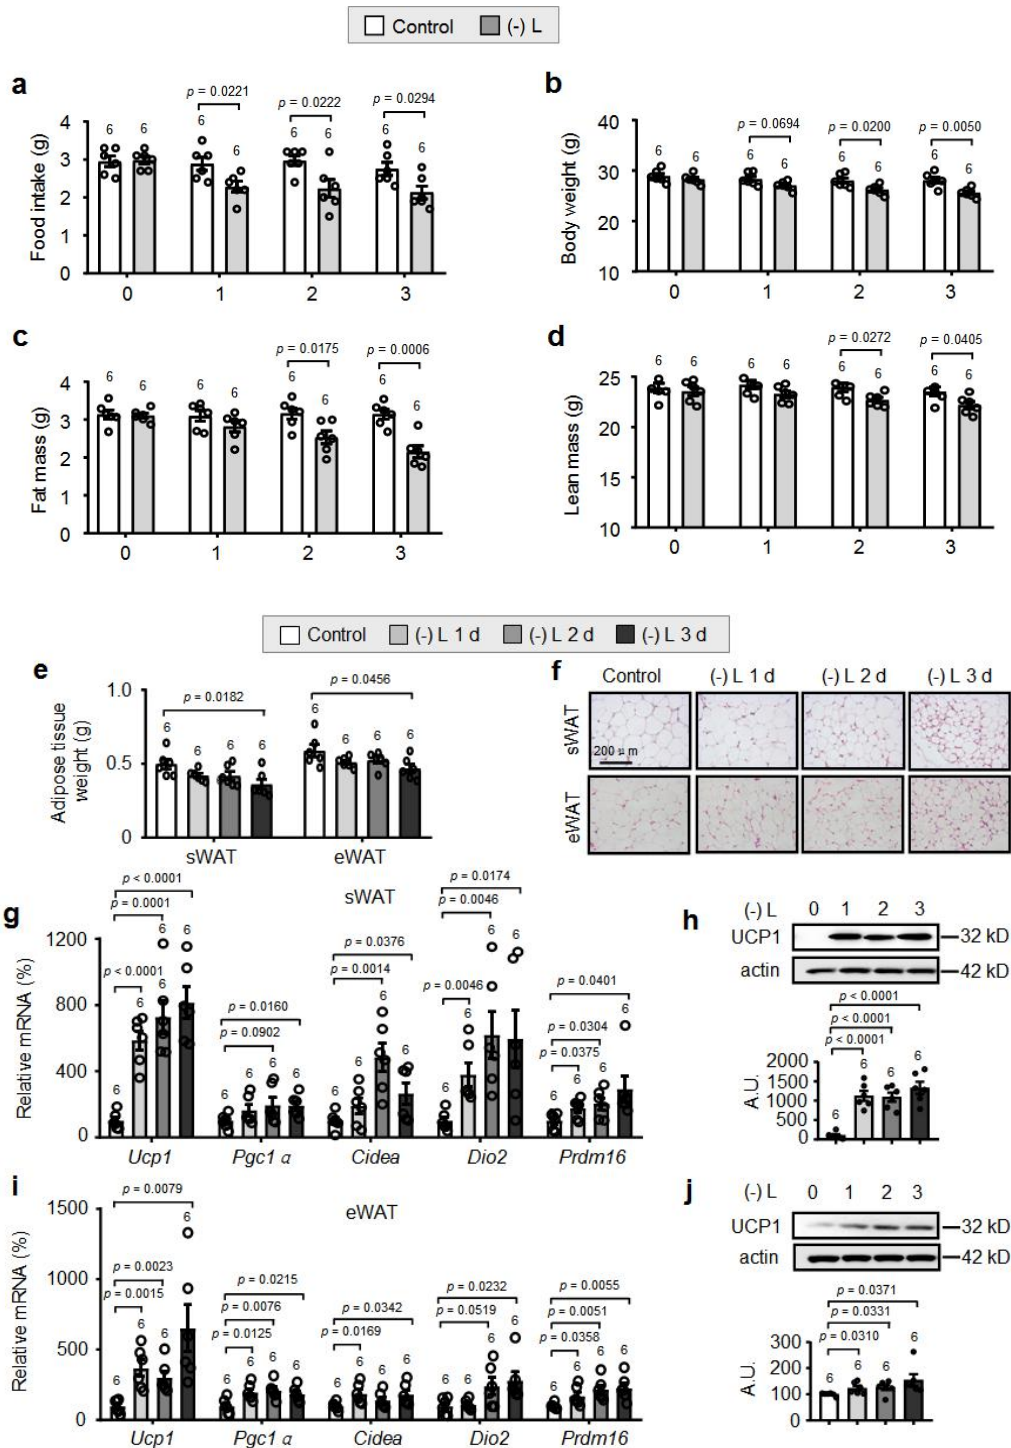

**Supplementary Figure 2. Metabolic parameters over the three days period under leucine deprivation. a** Food intake. **b** Body weight. **c** Fat mass by NMR. **d** Lean mass by NMR. **e** Subcutaneous WAT (sWAT) and Epididymal WAT (eWAT) weight. **f** Representative images of hematoxylin and eosin (H&E) staining of sWAT and

eWAT. **g** Gene expression of *Ucp1*, *Pgcl1*, *Cidea*, *Dio2* and *Prdm16* in sWAT by RT-PCR. **h** UCP1 protein in sWAT by western blotting (top) and quantified by densitometric analysis (bottom), A.U.: arbitrary units. **i** Gene expression of *Ucp1*, *Pgcl1*, *Cidea*, *Dio2* and *Prdm16* in eWAT by RT-PCR. **j** UCP1 protein in eWAT by western blotting (top) and quantified by densitometric analysis (bottom). Studies were conducted using 16- to 17-week-old male wild-type mice fed a control (Control) or leucine-deficient [(-) L] diet for three days for **a-d**, or provided with a leucine-deficient diet one day [(-) L 1 d], two days [(-) L 2 d], three days [(-) L 3 d] or without this diet (Control) prior to be used for **e-j**. Data are expressed as the mean  $\pm$  SEM (n represents number of samples and are indicated above the bar graph), with individual data points. Data were analyzed by two-tailed unpaired Student's t test for **a-d**, or by one-way ANOVA followed by the SNK (Student–Newman–Keuls) test for **e-j**. Source data are provided as a Source Data file.

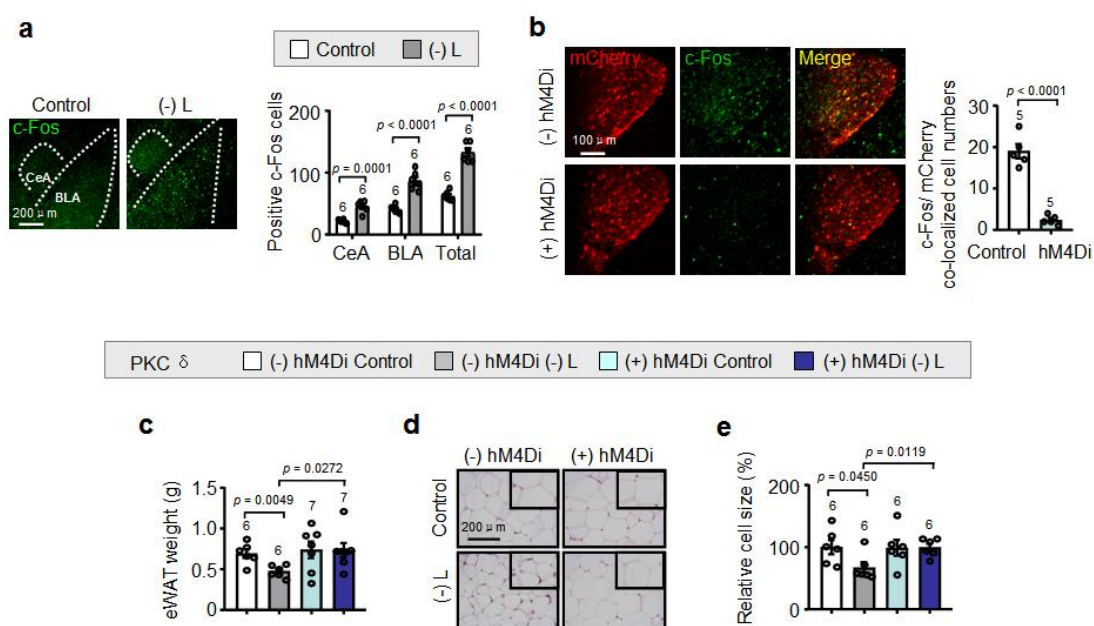

**Supplementary Figure 3. Metabolic parameters related to mice with inhibition of PKC- $\delta$  neuronal activity under leucine deprivation.** **a** Immunofluorescence (IF) staining for c-Fos (green) in amygdala sections and quantification of c-Fos positive cells. CeA: the central nuclei of the amygdala; BLA: the basolateral nuclei of the amygdala. **b** IF staining for mCherry (red), c-Fos (green) and merge (yellow) in CeA sections (left), and quantification of c-Fos and mCherry colocalized cell numbers (right). **c** Epididymal WAT (eWAT) weight. **d** Representative images of hematoxylin and eosin (H&E) staining of eWAT. **e** eWAT cell size quantified by Image J analysis of H&E images. Studies for **a** were conducted using 14- to 15-week-old male wild-type mice fed a control (Control) or leucine-deficient [(-) L] diet for 3 days; studies for **b-e** were conducted using 22- to 24-week-old male PKC- $\delta$ -Cre mice receiving AAVs expressing mCherry (PKC $\delta$  - hM4Di) or hM4Di (PKC $\delta$  + hM4Di) and fed a Control or (-) L diet for 3 days. Data are expressed as the mean  $\pm$  SEM (n represents number of samples and are indicated above the bar graph), with individual data points. Data were analyzed by one-way ANOVA followed by the SNK (Student–Newman–Keuls) test for **c** and **e**, or by two-tailed unpaired Student’s t test for **a** and **b**. Source data are provided as a Source Data file.

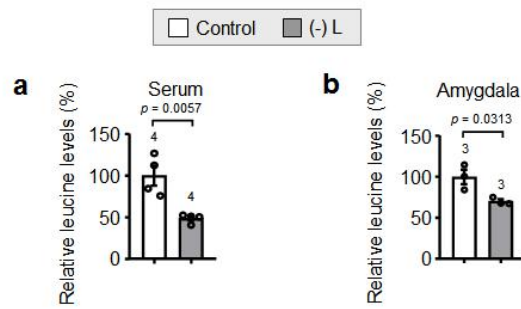

**Supplementary Figure 4. Leucine deprivation decreases leucine levels in serum and amygdala.** **a** Leucine levels in serum. **b** Leucine levels in the amygdala. Studies were conducted using 14- to 15-week-old male wild-type mice fed a control (Control) or leucine-deficient [(-) L] diet for 3 days. Data are expressed as the mean  $\pm$  SEM (n represents number of samples and are indicated above the bar graph), with individual data points. Data were analyzed by two-tailed unpaired Student's t test. Source data are provided as a Source Data file.

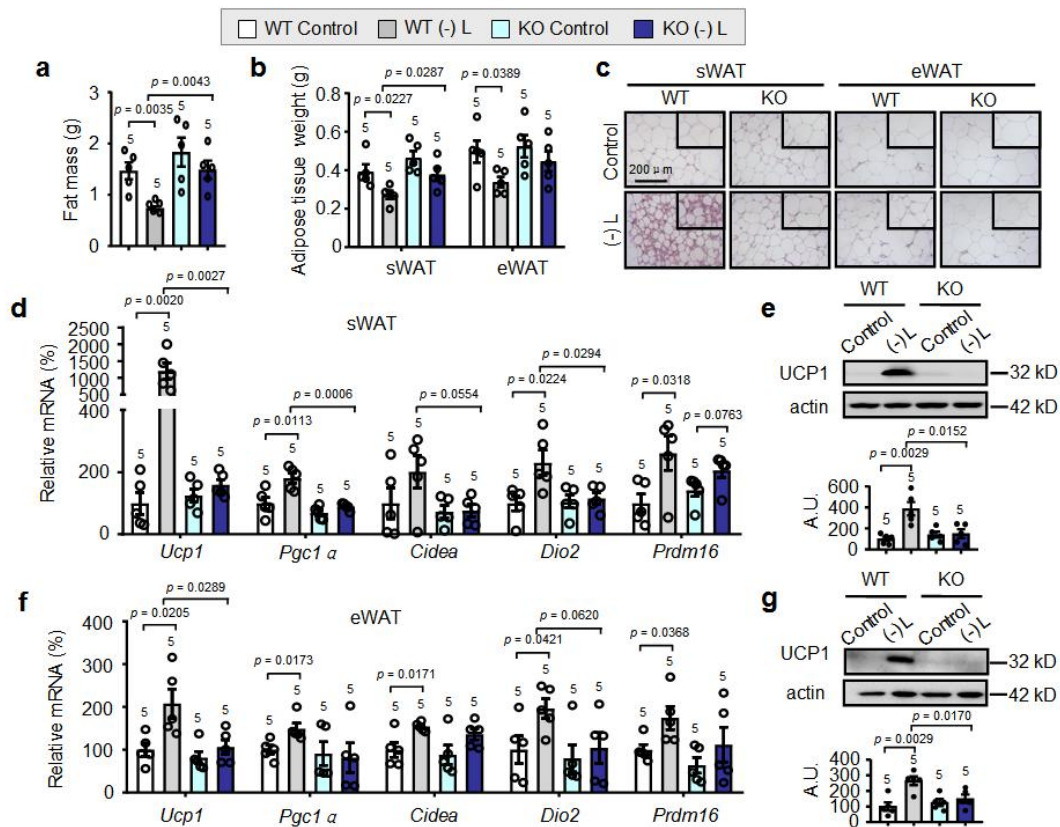

**Supplementary Figure 5. Leucine deprivation-stimulated WAT browning is blocked in *GCN2*<sup>-/-</sup> mice.** **a** Fat mass by NMR. **b** Subcutaneous WAT (sWAT) and epididymal WAT (eWAT) weight. **c** Representative images of hematoxylin and eosin (H&E) staining of sWAT and eWAT. **d** Gene expression of *Ucp1*, *Pgc1a*, *Cidea*, *Dio2* and *Prdm16* in sWAT by RT-PCR. **e** UCP1 protein in sWAT by western blotting (top) and quantified by densitometric analysis (bottom), A.U.: arbitrary units. **f** Gene expression of *Ucp1*, *Pgc1a*, *Cidea*, *Dio2* and *Prdm16* in eWAT by RT-PCR. **g** UCP1 protein in eWAT by western blotting (top) and quantified by densitometric analysis (bottom). Studies were conducted using 9- to 10-week-old male wild-type (WT) or *GCN2*<sup>-/-</sup> (KO) mice fed a control (Control) or leucine-deficient [(-) L] diet for 3 days. Data are expressed as the mean  $\pm$  SEM (n represents number of samples and are indicated above the bar graph), with individual data points. Data were analyzed by

one-way ANOVA followed by the SNK (Student–Newman–Keuls) test. Source data are provided as a Source Data file.

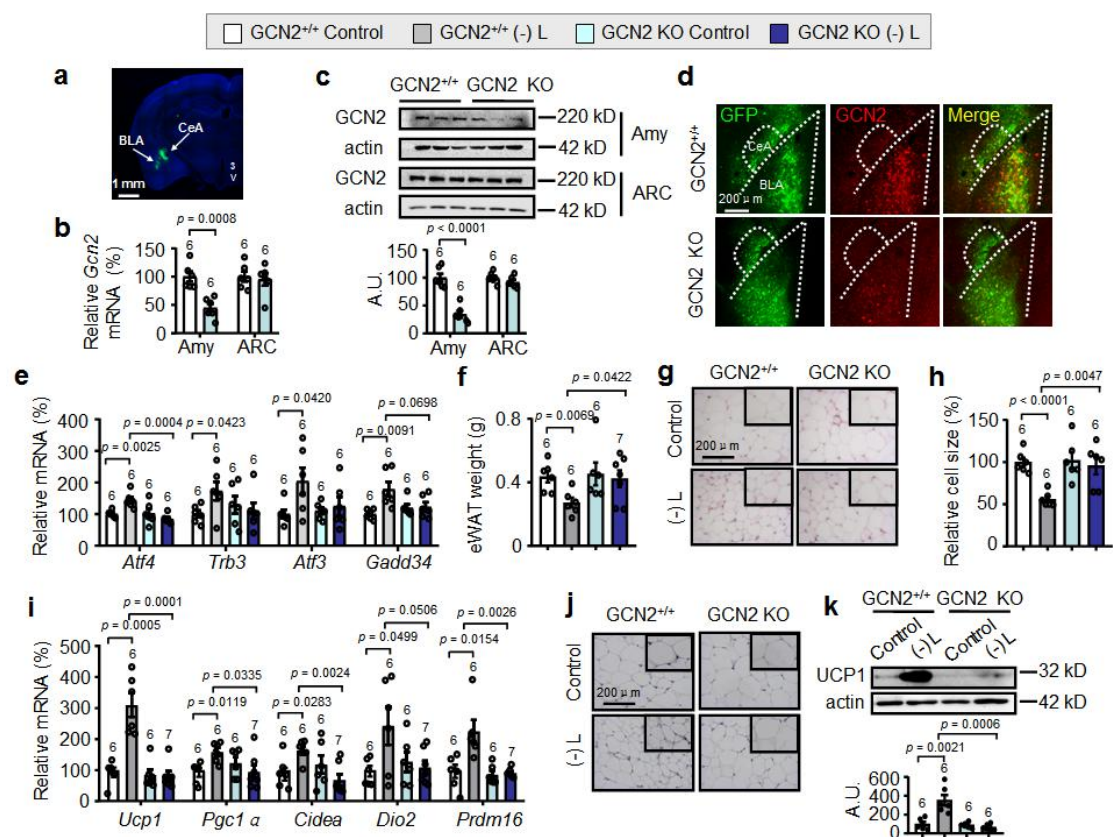

**Supplementary Figure 6. Metabolic parameters in mice with GCN2 deletion in amygdala (GCN2 KO) under leucine deprivation.** **a** Post hoc visualization of GFP (green) and DAPI (blue) in the amygdala in a GCN2<sup>+/+</sup> mice receiving AAV-Cre-GFP stereotaxic injections (n=3); CeA: the central nuclei of the amygdala; BLA: the basolateral nuclei of the amygdala; 3V, third ventricle. **b** Gene expression of *Gcn2* in amygdala (Amy) or arcuate nucleus of the hypothalamus (ARC) by RT-PCR. **c** GCN2 proteins in Amy or ARC by western blotting (top) and quantified by densitometric analysis (bottom), A.U.: arbitrary units. **d** Immunofluorescence (IF) staining for GFP (green), GCN2 (red) and merge (yellow) in amygdala sections (n=3



per group). CeA: the central nuclei of the amygdala; BLA: the basolateral nuclei of the amygdala. **e** Gene expression of *ATF4*, *Trb3*, *Atf3* and *Gadd34* in amygdala by RT-PCR. **f** Epididymal WAT (eWAT) weight. **g** Representative images of hematoxylin and eosin (H&E) staining of eWAT. **h** eWAT cell size quantified by Image J analysis of H&E images. **i** Gene expression of *Ucp1*, *Pgcl1*, *Cidea*, *Dio2* and *Prdm16* in eWAT by RT-PCR. **j** Representative images of immunohistochemistry (IHC) of UCP1 in eWAT. **k** UCP1 protein in eWAT by western blotting (top) and quantified by densitometric analysis (bottom). All studies were conducted using 20- to 22-week-old male control mice (GCN2<sup>+/+</sup>) or mice with GCN2 deletion in amygdala (GCN2 KO) fed a control (Control) or leucine-deficient [(-) L] diet for 3 days. Data are expressed as the mean ± SEM (n represents number of samples and are indicated above the bar graph), with individual data points. Data were analyzed by two-tailed unpaired Student's t test for **b** and **c**, or by one-way ANOVA followed by the SNK (Student–Newman–Keuls) test for **e-k**. Source data are provided as a Source Data file.

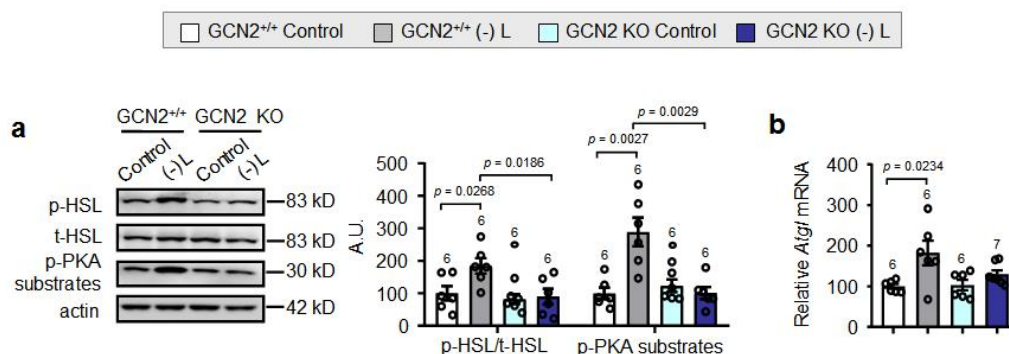

**Supplementary Figure 7. The effect of GCN2 knockdown in amygdala on lipolysis-related gene and proteins in subcutaneous WAT (sWAT) under leucine**

**deprivation.** **a** P-HSL, t-HSL and p-PKA substrates proteins in sWAT by western blotting (left) and quantified by densitometric analysis (right), A.U.: arbitrary units. **b** Gene expression of *Atgl* in sWAT by RT-PCR. All studies were conducted using 20- to 22-week-old male control mice (GCN2<sup>+/+</sup>) or mice with GCN2 deletion in amygdala (GCN2 KO) fed a control (Control) or leucine-deficient [(-) L] diet for 3 days. Data are expressed as the mean  $\pm$  SEM (n represents number of samples and are indicated above the bar graph), with individual data points. Data were analyzed by one-way ANOVA followed by the SNK (Student–Newman–Keuls) test. Source data are provided as a Source Data file.

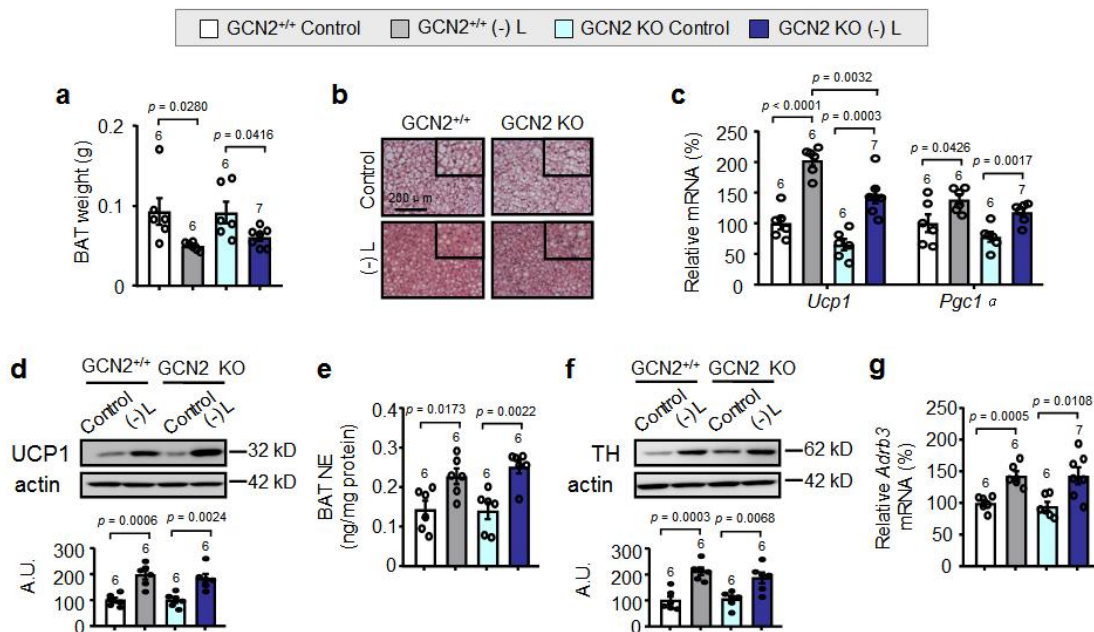

**Supplementary Figure 8. GCN2 knockdown in amygdala has no obvious effect on BAT under leucine deprivation.** **a** BAT weight. **b** Representative images of hematoxylin and eosin (H&E) staining of BAT (n=3 per group). **c**: Gene expression of *Ucp1* and *Pgc1 $\alpha$*  in BAT by RT-PCR. **d** UCP1 protein in BAT by western blotting

(top) and quantified by densitometric analysis (bottom) , A.U.: arbitrary units. **e** Norepinephrine (NE) levels in BAT measured by ELISA kit. **f** TH protein in BAT by western blotting (top) and quantified by densitometric analysis (bottom). **g** Gene expression of *Adrb3* in BAT by RT-PCR. All studies were conducted using 20- to 22-week-old male control mice (GCN2<sup>+/+</sup>) or mice with GCN2 deletion in amygdala (GCN2 KO) fed a control (Control) or leucine-deficient [(-) L] diet for 3 days. Data are expressed as the mean ± SEM (n represents number of samples and are indicated above the bar graph), with individual data points. Data were analyzed by one-way ANOVA followed by the SNK (Student–Newman–Keuls) test. Source data are provided as a Source Data file.

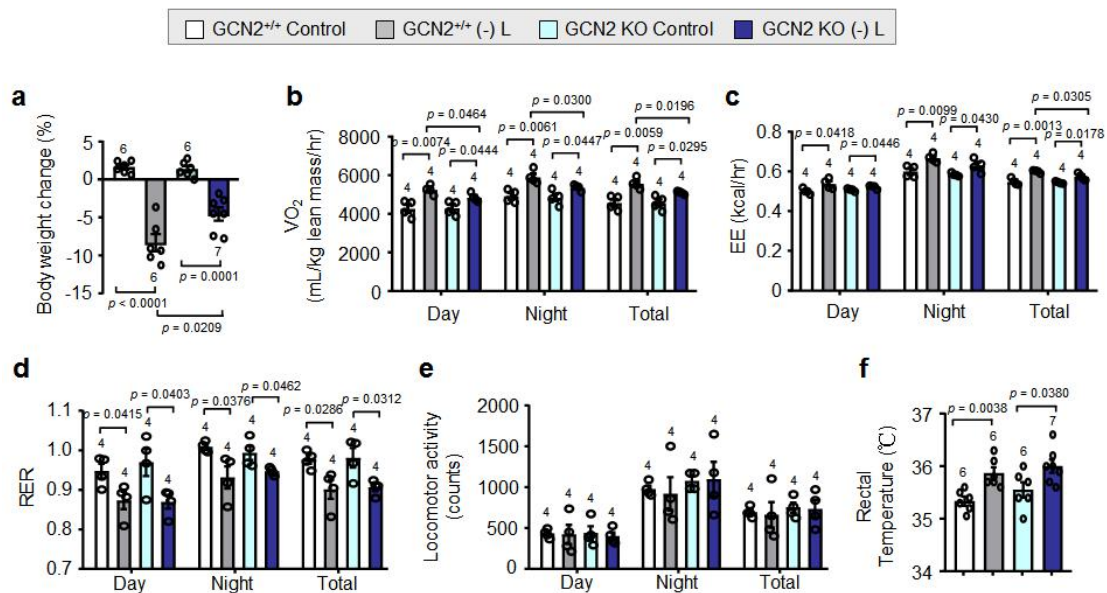

**Supplementary Figure 9. The effect of GCN2 knockdown in amygdala on the indirect calorimetry and body temperature under leucine deprivation. a** Body weight change relative to original body weight. **b** 24-h oxygen consumption normalized by lean mass measured by the comprehensive lab animal monitoring

system (CLAMS). **c** Energy expenditure (EE) measured by CLAMS. **d** Respiratory exchange ratio (RER,  $V_{CO_2}/V_{O_2}$ ) measured by CLAMS. **e** Locomotor activity measured by CLAMS. **f** Rectal temperature by the digital thermometer. All studies were conducted using 20- to 22-week-old male control mice (GCN2<sup>+/+</sup>) or mice with GCN2 deletion in amygdala (GCN2 KO) fed a control (Control) or leucine-deficient [(-) L] diet for 3 days. Data are expressed as the mean  $\pm$  SEM (n represents number of samples and are indicated above the bar graph), with individual data points. Data were analyzed by one-way ANOVA followed by the SNK (Student–Newman–Keuls) test. Source data are provided as a Source Data file.

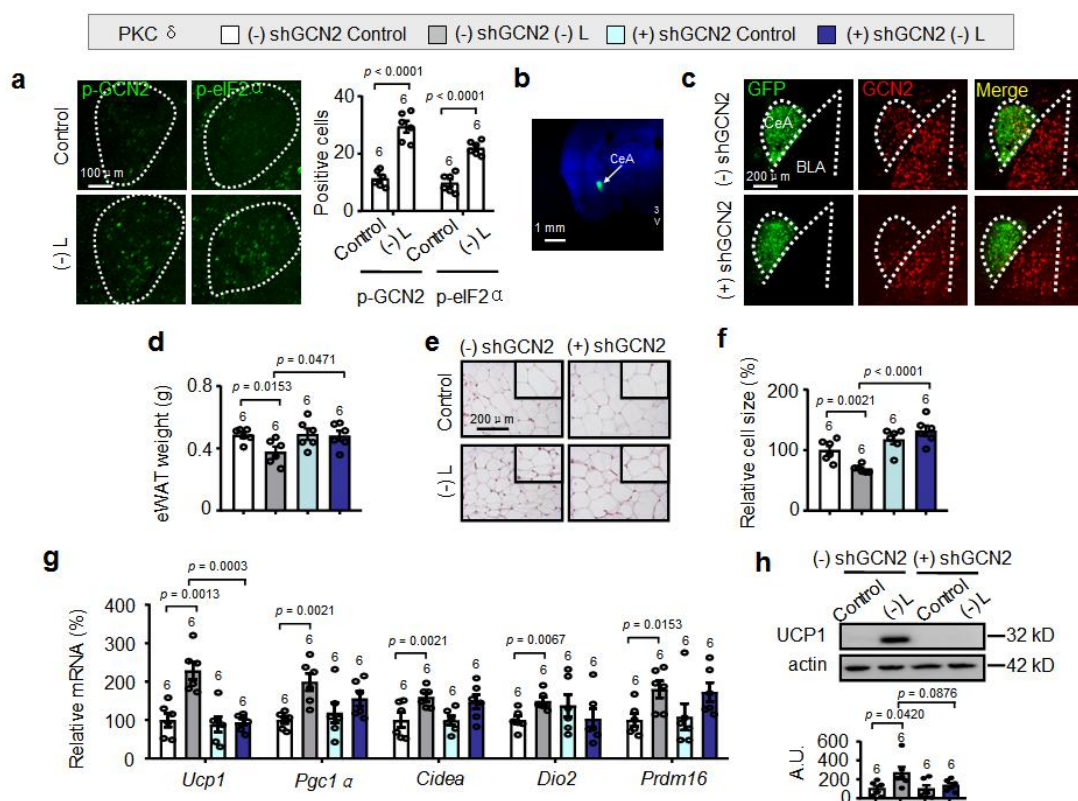

**Supplementary Figure 10. Metabolic parameters related to mice with GCN2 knockdown in amygdalar PKC- $\delta$  neurons under leucine deprivation. a**

Immunofluorescence (IF) staining for p-GCN2 and p-eIF2 $\alpha$  (left) and quantification of p-GCN2 and p-eIF2 $\alpha$  (right) in central amygdala. **b** Post hoc visualization of GFP (green) and DAPI (blue) in central amygdala (CeA) in PKC- $\delta$ -Cre mice receiving AAV-Flex-shGCN2-GFP stereotaxic injections (n = 3); 3V, third ventricle. **c** IF staining for GFP (green), GCN2 (red) and merge (yellow) in amygdala (n = 3 per group); CeA: the central nuclei of the amygdala; BLA: the basolateral nuclei of the amygdala. **d** Epididymal WAT (eWAT) weight. **e** Representative images of hematoxylin and eosin (H&E) staining of eWAT. **f** eWAT cell size quantified by Image J analysis of H&E images. **g** Gene expression of *Ucp1*, *Pgc1a*, *Cidea*, *Dio2* and *Prdm16* in eWAT by RT-PCR. **h** UCP1 protein in eWAT by western blotting (top) and quantified by densitometric analysis (bottom), A.U.: arbitrary units. Studies for **a** were conducted using 14- to 15-week-old male wild-type mice fed a control (Control) or leucine-deficient [(-) L] diet for 3 days; studies for **b-h** were conducted using 13- to 16-week-old male PKC- $\delta$ -Cre mice receiving AAVs expressing GFP (PKC  $\delta$  - shGCN2) or shGCN2 (PKC  $\delta$  + shGCN2) fed a Control or (-) L diet for 3 days. Data are expressed as the mean  $\pm$  SEM (n represents number of samples and are indicated above the bar graph), with individual data points. Data were analyzed by two-tailed unpaired Student's t test for **a**, or one-way ANOVA followed by the SNK (Student–Newman–Keuls) test for **d-h**. Source data are provided as a Source Data file.

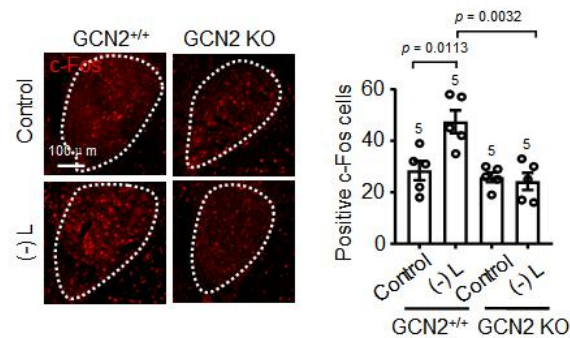

**Supplementary Figure 11. C-Fos staining in the amygdala of amygdalar GCN2 deletion mice under leucine deprivation.** Immunofluorescence (IF) staining for c-Fos (red) in central amygdala (CeA) sections (left) and quantification of c-Fos positive cells (right). Studies were conducted using 20- to 22-week-old male control mice (GCN2<sup>+/+</sup>) or mice with GCN2 deletion in amygdala (GCN2 KO) fed a control (Control) or leucine-deficient [(-) L] diet for 3 days. Data are expressed as the mean  $\pm$  SEM (n represents number of samples and are indicated above the bar graph), with individual data points. Data were analyzed by one-way ANOVA followed by the SNK (Student–Newman–Keuls) test. Source data are provided as a Source Data file.

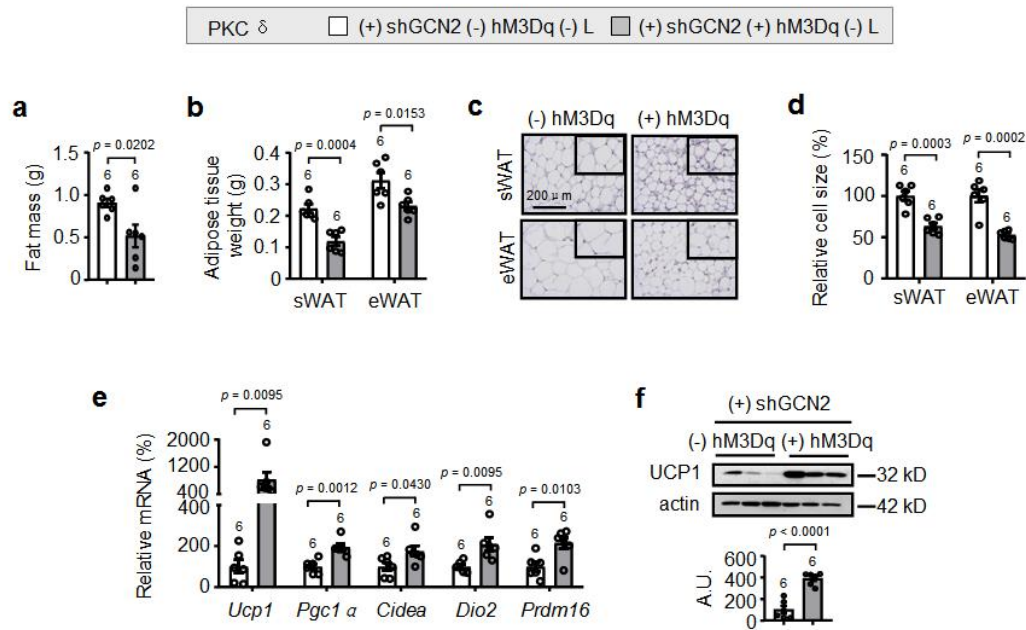

**Supplementary Figure 12. Activation of PKC- $\delta$  neurons could reverse the blocking effect of GCN2 knockdown on leucine deprivation-induced browning. a** Fat mass by NMR. **b** Subcutaneous WAT (sWAT) and epididymal WAT (eWAT) weight. **c** Representative images of hematoxylin and eosin (H&E) staining of sWAT and eWAT. **d** sWAT and eWAT cell size quantified by Image J analysis of H&E images. **e** Gene expression of *Ucp1*, *Pgc1a*, *Cidea*, *Dio2* and *Prdm16* in sWAT by RT-PCR. **f** UCP1 protein in sWAT by western blotting (top) and quantified by densitometric analysis (bottom), A.U.: arbitrary units. Studies were conducted using 13- to 15-week-old male PKC- $\delta$ -Cre mice receiving AAVs expressing shGCN2 and mCherry (PKC $\delta$  + shGCN2 - hM3Dq) or shGCN2 and hM3Dq (PKC $\delta$  + shGCN2 + hM3Dq), all received CNO injections every 12h for 3 days, simultaneously fed a leucine-deficient [(-) L] diet for 3 days. Data are expressed as the mean  $\pm$  SEM (n represents number of samples and are indicated above the bar graph), with individual data points. Data were analyzed by two-tailed unpaired Student's t test. Source data

are provided as a Source Data file.

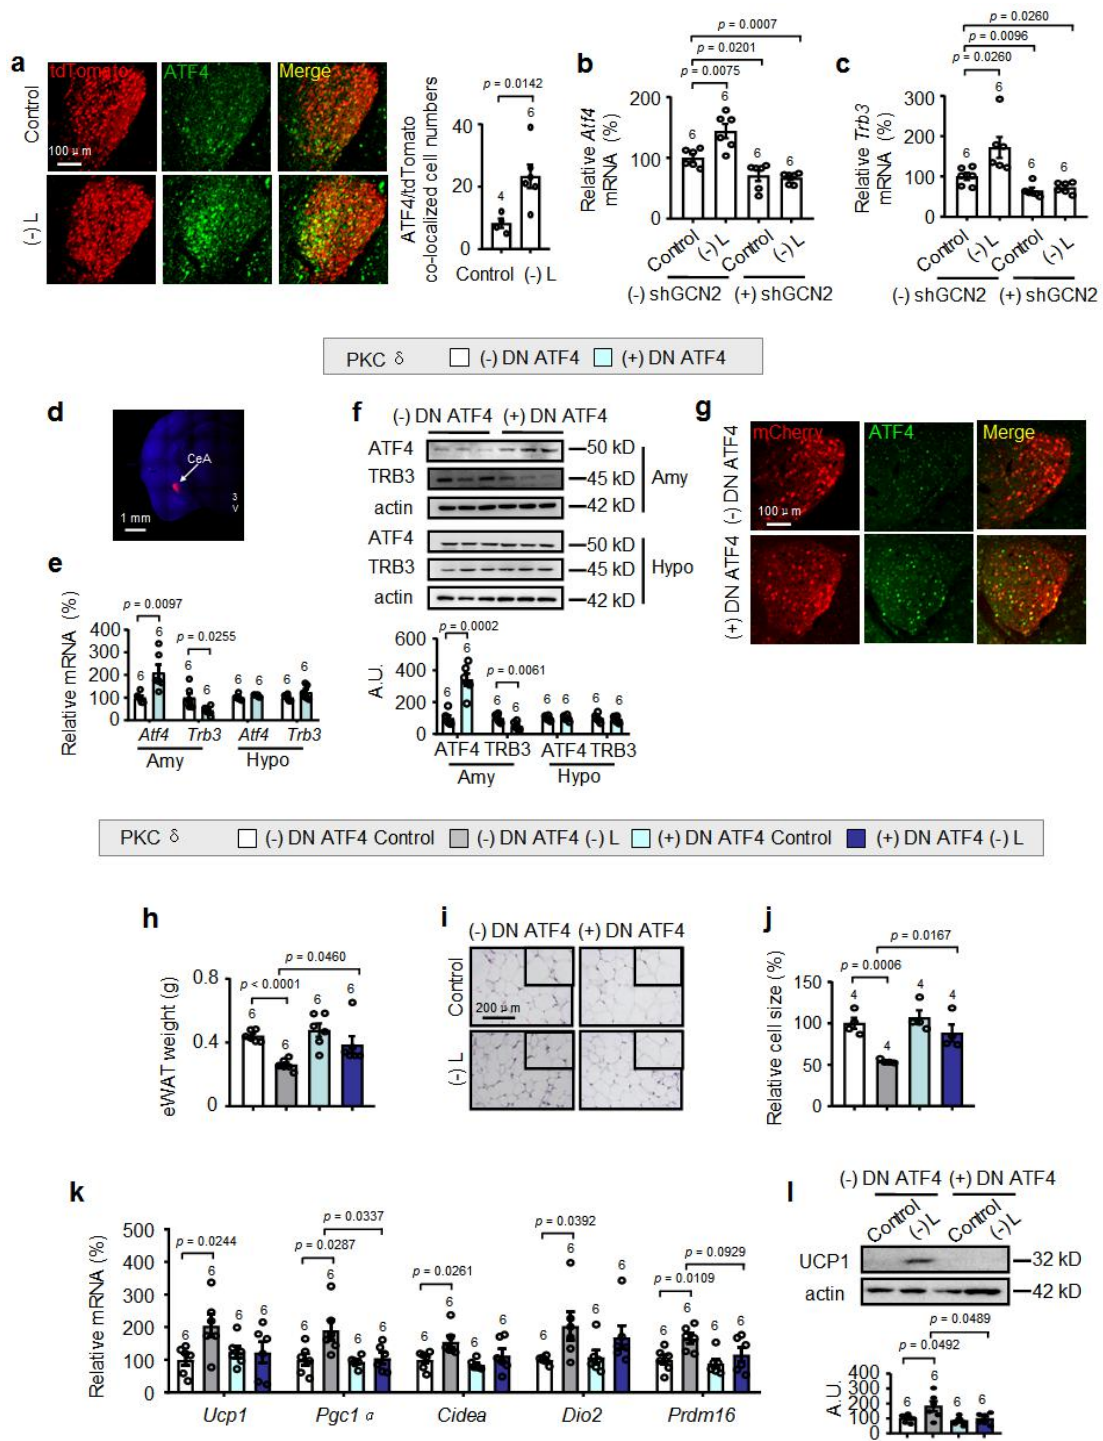

**Supplementary Figure 13. Metabolic parameters related to mice with ATF4 knockdown in amygdalar PKC- $\delta$  neurons under leucine deprivation. a** Immunofluorescence (IF) staining for tdTomato (red), ATF4 (green) and merge



(yellow) in central amygdala (CeA) sections (left), and quantification of ATF4 and tdTomato colocalized cell numbers (right). **b** Gene expression of *Atf4* in amygdala by RT-PCR. **c** Gene expression of *Trb3* in amygdala by RT-PCR. **d** Post hoc visualization of mCherry (red) and DAPI (blue) in CeA of PKC- $\delta$ -Cre mice receiving AAV-DIO-DN-ATF4-mCherry stereotaxic injections (n = 3); 3V, third ventricle. **e** Gene expression of *Atf4* and *Trb3* in amygdala (Amy) and hypothalamus (Hypo) by RT-PCR. **f** ATF4 and TRB3 proteins in Amy and Hypo by western blotting (left) and quantified by densitometric analysis (right), A.U.: arbitrary units. **g** IF staining for mCherry (red), ATF4 staining (green) or merge (yellow) in CeA sections (n = 3 per group). **h** Epididymal WAT (eWAT) weight. **i** Representative images of hematoxylin and eosin (H&E) staining of eWAT. **j** eWAT cell size quantified by Image J analysis of H&E images. **k** Gene expression of *Ucp1*, *Pgc1a*, *Cidea*, *Dio2* and *Prdm16* in eWAT by RT-PCR. **l** UCP1 protein in eWAT by western blotting (top) and quantified by densitometric analysis (bottom). Studies for **a** were conducted using 12- to 14-week-old male PKC- $\delta$ -Cre/Ai9 mice fed a control (Control) or leucine-deficient [(-) L] diet for 3 days; studies for **b** and **c** were conducted using 13- to 16-week-old male PKC- $\delta$ -Cre mice receiving AAVs expressing GFP (PKC  $\delta$  - shGCN2) or shGCN2 (PKC  $\delta$  + shGCN2) fed a Control or (-) L diet for 3 days; studies for **d-l** were conducted using or 13- to 16-week-old male PKC- $\delta$ -Cre mice receiving AAVs expressing mCherry (PKC $\delta$  - DN ATF4) or DN ATF4 (PKC $\delta$  + DN ATF4) fed a Control or (-) L diet for 3 days. Data are expressed as the mean  $\pm$  SEM (n represents number of samples and are indicated above the bar graph), with individual data points.

Data were analyzed by two-tailed unpaired Student's t test for **a**, **d** and **f**, or by one-way ANOVA followed by the SNK (Student–Newman–Keuls) test for **b**, **c** and **h-l**. Source data are provided as a Source Data file.

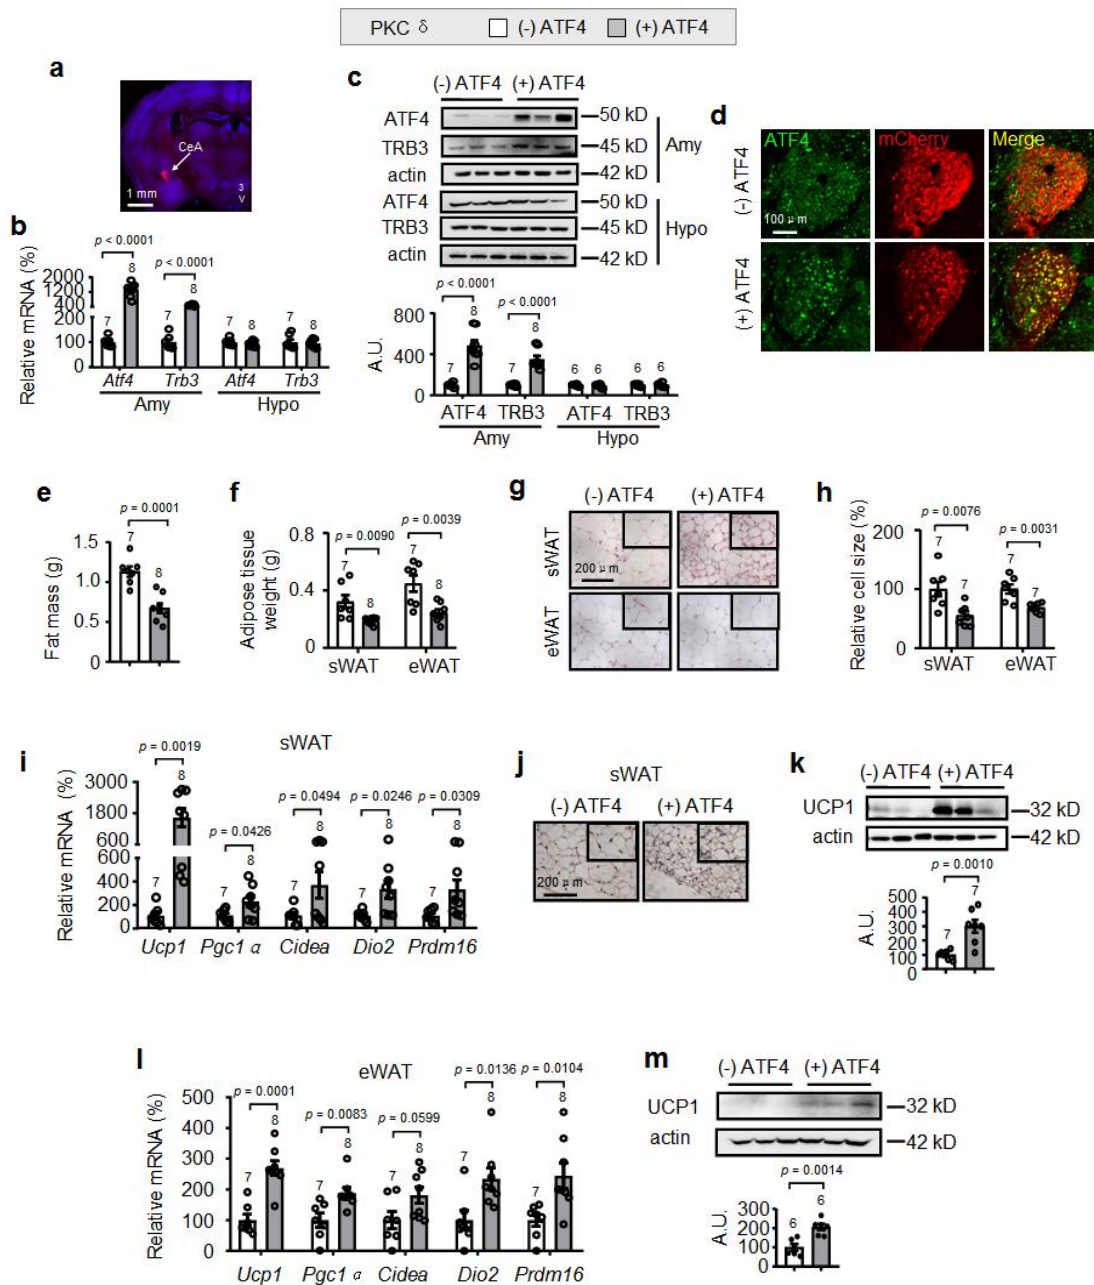

**Supplementary Figure 14. Over-expression of ATF4 in amygdalar PKC- $\delta$  neurons mimics leucine deprivation-induced WAT browning.** **a** Post hoc

visualization of mCherry (red) and DAPI (blue) in central amygdala (CeA) of PKC- $\delta$ -Cre mice receiving AAV-DIO-ATF4-GFP stereotaxic injections (n = 3); 3V, third ventricle. **b** Gene expression of *Atf4* and *Trb3* in amygdala (Amy) and hypothalamus (Hypo). **c** ATF4 and TRB3 proteins in Amy and Hypo by western blotting (left) and quantified by densitometric analysis (right), A.U.: arbitrary units. **d** Immunofluorescence (IF) staining for mCherry (red), ATF4 (green) or merge (yellow) in CeA (n = 3 per group). **e** Fat mass by NMR. **f** Adipose tissue weight. **g** Representative images of hematoxylin and eosin (H&E) staining of subcutaneous WAT (sWAT) and epididymal WAT (eWAT). **h** sWAT and eWAT cell size quantified by Image J analysis of H&E images. **i** Gene expression of *Ucp1*, *Pgcl1*, *Cidea*, *Dio2* and *Prdm16* in sWAT by RT-PCR. **j** Representative images of immunohistochemistry (IHC) of UCP1 in sWAT. **k** UCP1 protein in sWAT by western blotting (top) and quantified by densitometric analysis (bottom). **l** Gene expression of *Ucp1*, *Pgcl1*, *Cidea*, *Dio2* and *Prdm16* in eWAT by RT-PCR. **m** UCP1 protein in eWAT by western blotting (top) and quantified by densitometric analysis (bottom). Studies were conducted using 13- to 15-week-old male PKC- $\delta$ -Cre mice receiving AAVs expressing mCherry (PKC  $\delta$  - ATF4) or ATF4 (PKC  $\delta$  + ATF4). Data are expressed as the mean  $\pm$  SEM (n represents number of samples and are indicated above the bar graph), with individual data points. Data were analyzed by two-tailed unpaired Student's t test. Source data are provided as a Source Data file.

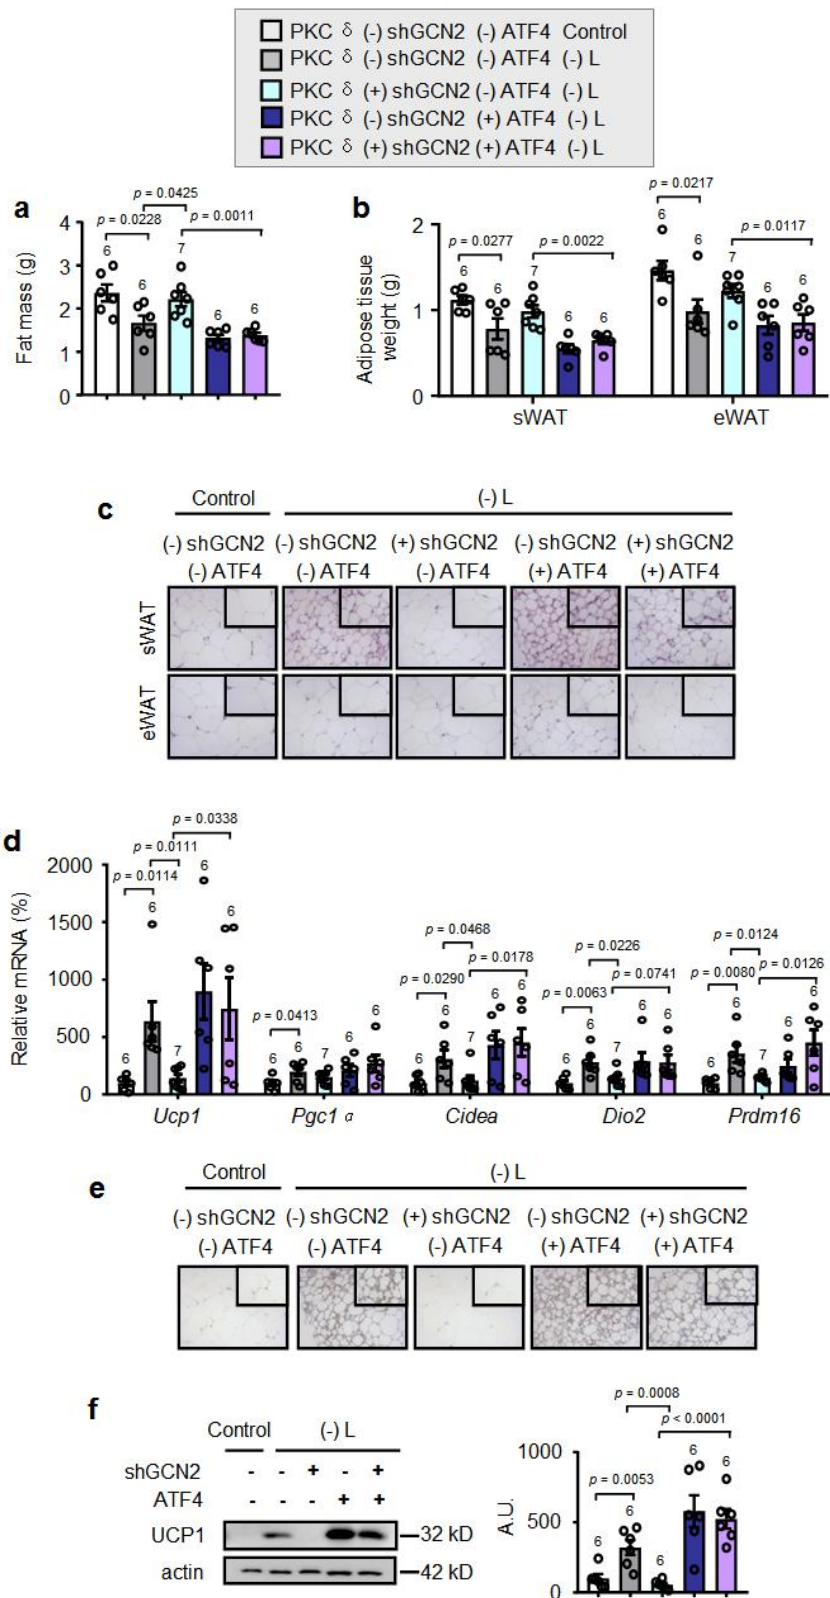

**Supplementary Figure 15. Metabolic parameters related to mice with GCN2 knockdown with or without ATF4 over-expression in amygdalar PKC- $\delta$  neurons under leucine deprivation. a Fat mass by NMR. b Adipose tissue weight. c**

Representative images of hematoxylin and eosin (H&E) staining of subcutaneous WAT (sWAT) and epididymal WAT (eWAT)(n = 3 per group). **d** Gene expression of *Ucp1*, *Pgc1a*, *Cidea*, *Dio2* and *Prdm16* in sWAT by RT-PCR. **e** Representative images of immunohistochemistry (IHC) of UCP1 in sWAT. **f** UCP1 protein in sWAT by western blotting (left) and quantified by densitometric analysis (right), A.U.: arbitrary units. Studies were conducted using 20- to 22-week-old male PKC- $\delta$ -Cre mice receiving AAVs expressing GFP and mCherry (PKC  $\delta$  - shGCN2 - ATF4), or shGCN2 and mCherry (PKC  $\delta$  + shGCN2 - ATF4), or GFP and ATF4 (PKC  $\delta$  - shGCN2 + ATF4), or shGCN2 and ATF4 (PKC  $\delta$  + shGCN2 + ATF4) fed a leucine-deficient [(-) Leu] diet for 3 days; or receiving AAVs expressing GFP and mCherry (PKC  $\delta$  - shGCN2 - ATF4) fed a control diet (Control) for 3 days. Data are expressed as the mean  $\pm$  SEM (n represents number of samples and are indicated above the bar graph), with individual data points. Data were analyzed by one-way ANOVA followed by the SNK (Student–Newman–Keuls) test. Source data are provided as a Source Data file.

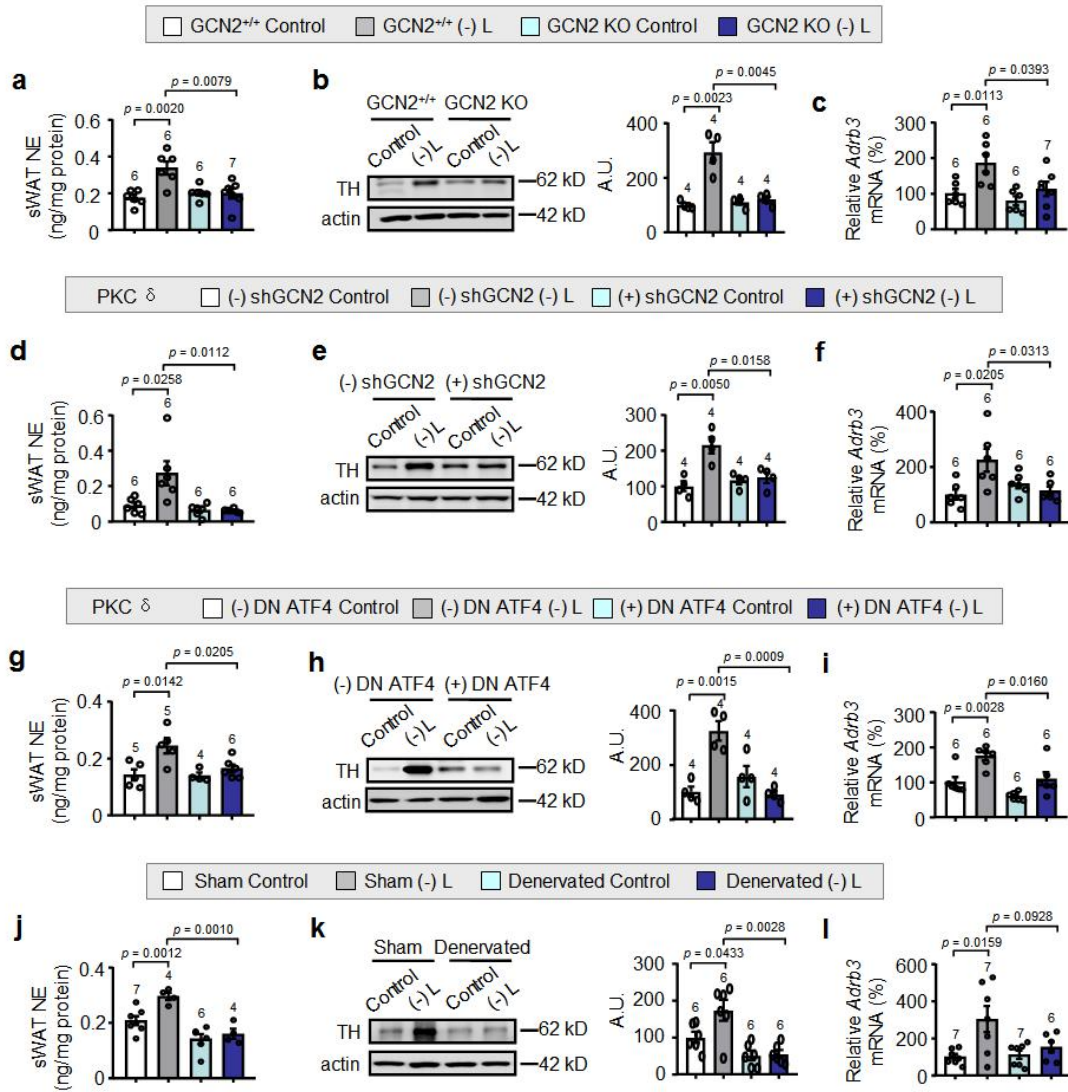

**Supplementary Figure 16. The activity of sympathetic nervous system (SNS) in several groups of mice. a** Norepinephrine (NE) levels in subcutaneous WAT (sWAT) measured by ELISA kit. **b** Tyrosine hydroxylase (TH) protein in sWAT by western blotting (top) and quantified by densitometric analysis (bottom), A.U.: arbitrary units. **c** Gene expression of *Adrb3* in sWAT by RT-PCR. **d** NE levels in sWAT measured by ELISA kit. **e** TH protein in sWAT by western blotting (top) and quantified by densitometric analysis (bottom). **f** Gene expression of *Adrb3* in sWAT by RT-PCR. **g** NE levels in sWAT measured by ELISA kit. **h** TH protein in sWAT by western blotting (top) and quantified by densitometric analysis (bottom). **i** Gene expression of

*Adrb3* in sWAT by RT-PCR. **j** NE levels in sWAT measured by ELISA kit. **k** TH protein in sWAT by western blotting (top) and quantified by densitometric analysis (bottom). **l** Gene expression of *Adrb3* in sWAT by RT-PCR. Studies for **a-c** were conducted using 20- to 22-week-old male control mice (GCN2<sup>+/+</sup>) or mice with GCN2 deletion in amygdala (GCN2 KO) fed a control (Control) or leucine-deficient [(-) L] diet for 3 days; studies for **d-f** were conducted using 13- to 16-week-old male PKC- $\delta$ -Cre mice receiving AAVs expressing GFP (PKC  $\delta$  - shGCN2) or shGCN2 (PKC  $\delta$  + shGCN2) fed a Control or (-) L diet for 3 days; studies for **g-i** were conducted using 13- to 16-week-old male PKC- $\delta$ -Cre mice receiving AAVs expressing GFP (PKC  $\delta$  - DN ATF4) or DN ATF4 (PKC  $\delta$  + DN ATF4) fed a Control or (-) L diet for 3 days; studies for **j-l** were conducted using 12-week-old male WT mice with sham operated (Sham) or denervated (Denervated) fed a Control or (-) L diet for 3 days. Data are expressed as the mean  $\pm$  SEM (n represents number of samples and are indicated above the bar graph), with individual data points. Data were analyzed by one-way ANOVA followed by the SNK (Student–Newman–Keuls) test. Source data are provided as a Source Data file.

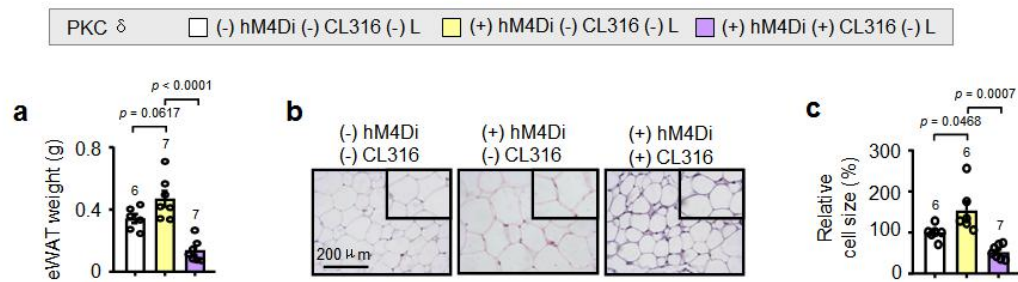

**Supplementary Figure 17. Metabolic parameters related to mice with inhibition**

**of PKC- $\delta$  neurons' activity and treated with CL316 under leucine deprivation. a** Epididymal WAT (eWAT) weight. **b.** Representative images of hematoxylin and eosin (H&E) staining of eWAT. **c** eWAT cell size quantified by Image J analysis of H&E images. Studies were conducted using 16- to 18-week-old male PKC  $\delta$  - hM4Di or PKC  $\delta$  + hM4Di mice injected with saline (- CL316) or CL316243 (+ CL316), all received CNO injections every 12h for 3 days, fed a leucine-deficient [(-) L] diet for 3 days. Data are expressed as the mean  $\pm$  SEM (n represents number of samples and are indicated above the bar graph), with individual data points. Data were analyzed by one-way ANOVA followed by the SNK (Student–Newman–Keuls) test. Source data are provided as a Source Data file.

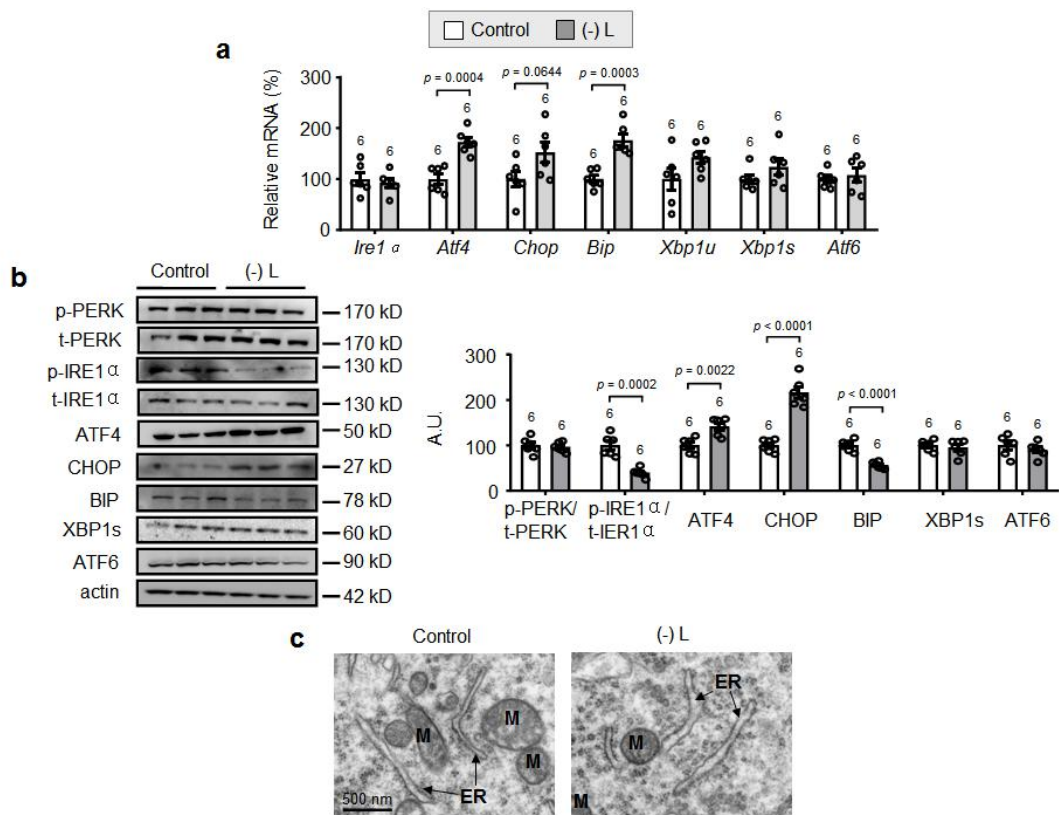

**Supplementary Figure 18. The signals of ER stress in amygdala under leucine**



**deprivation. a** Gene expression of *Irela*, *Atf4*, *Chop*, *Bip*, *Xbp1u*, *Xbp1s* and *Atf6* by RT-PCR. **b** P-PERK, t-PERK, p-IRE1 $\alpha$ , t-IRE1 $\alpha$ , ATF4, CHOP, BIP, XBP1s and ATF6 proteins by western blotting (left) and quantified by densitometric analysis (right), A.U.: arbitrary units. **c** Electron microscopy (EM) analysis of the amygdala (n = 3 per group); ER: endoplasmic reticulum; M: mitochondria. Studies were conducted using 14- to 15-week-old male wild-type mice fed a control (Control) or leucine-deficient [(-) L] diet for 3 days. Data are expressed as the mean  $\pm$  SEM (n represents number of samples and are indicated above the bar graph), with individual data points. Data were analyzed by two-tailed unpaired Student's t test. Source data are provided as a Source Data file.

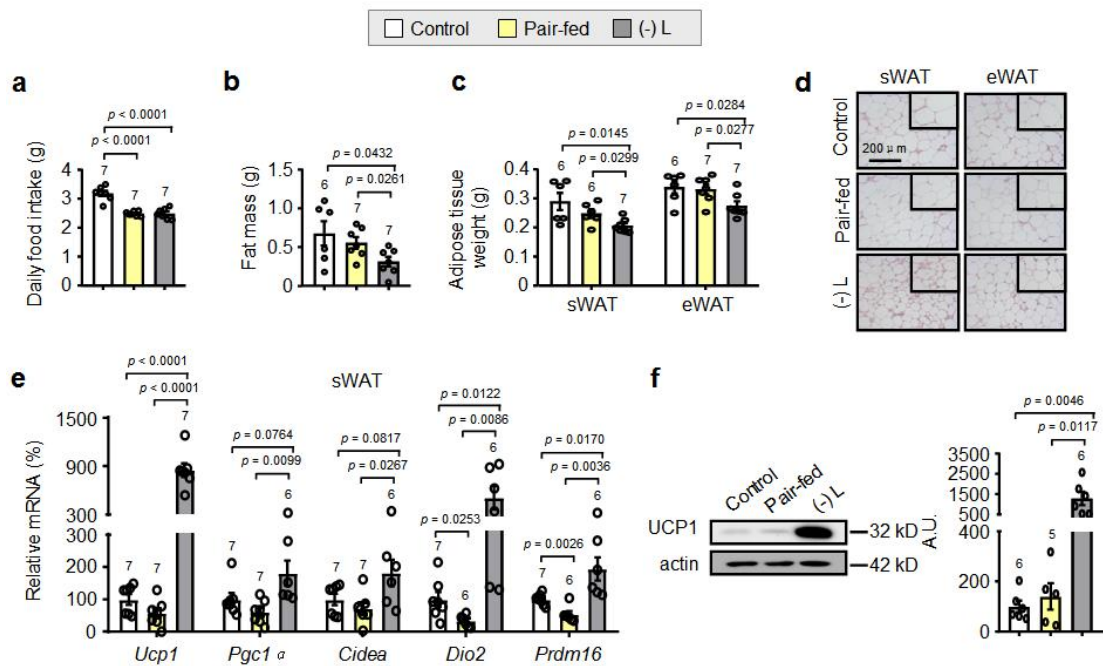

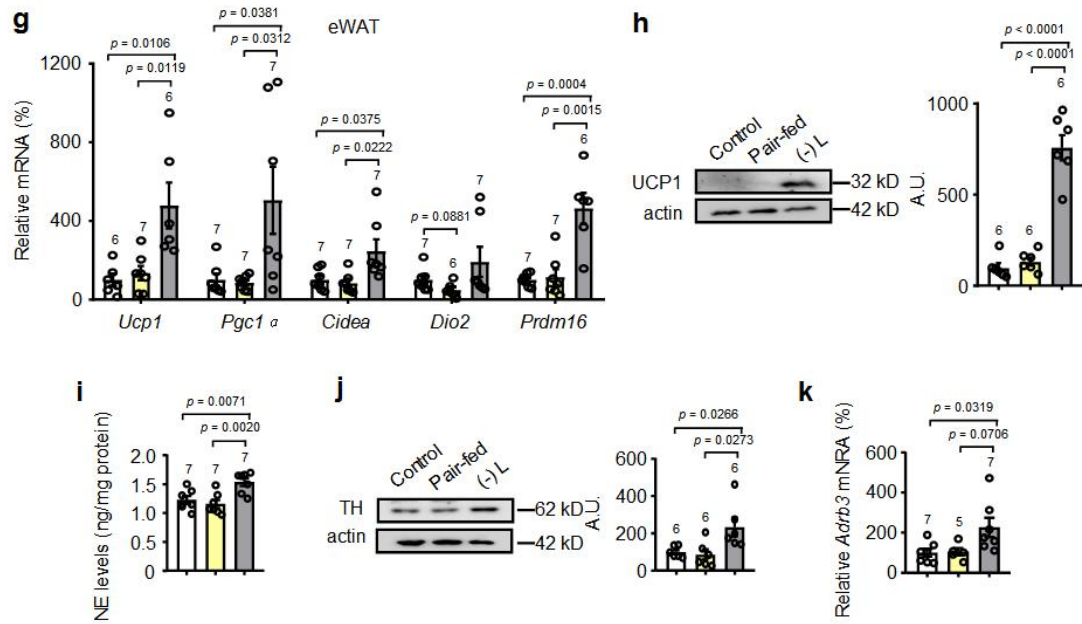

**Supplementary Figure 19. Pair-feeding has no significant impact on WAT browning and sympathetic nervous system activity.** **a** Daily food intake. **b** Fat mass by NMR. **c** Subcutaneous WAT (sWAT) and epididymal WAT (eWAT) weight. **d** Representative images of hematoxylin and eosin (H&E) staining of sWAT and eWAT (n = 3 per group). **e** Gene expression of *Ucp1*, *Pgc1a*, *Cidea*, *Dio2* and *Prdm16* in sWAT by RT-PCR. **f** UCP1 protein in sWAT by western blotting (left) and quantified by densitometric analysis (right), A.U.: arbitrary units. **g** Gene expression of *Ucp1*, *Pgc1a*, *Cidea*, *Dio2* and *Prdm16* in eWAT by RT-PCR. **h** UCP1 protein in eWAT by western blotting (left) and quantified by densitometric analysis (right). **i** Norepinephrine (NE) levels in sWAT measured by ELISA kit. **j** TH protein in sWAT by western blotting (left) and quantified by densitometric analysis (right). **k** Gene expression of *Adrb3* in sWAT by RT-PCR. Studies were conducted using 8-week-old male WT mice fed a control (Control), leucine-deficient [(-) L], or pair-fed (Pair-fed) diet for 3 days. Data are expressed as the mean  $\pm$  SEM (n

represents number of samples and are indicated above the bar graph), with individual data points. Data were analyzed by one-way ANOVA followed by the SNK (Student–Newman–Keuls) test. Source data are provided as a Source Data file.

**Supplementary Table 1. Primers used for gene amplification.**

| Gene          | Direction | Primer sequence 5'→3'    |
|---------------|-----------|--------------------------|
| GCN2          | F         | CCTGCACCATGAGAACATTG     |
|               | R         | CTGCCCAGTTCTTCAGTGT      |
| UCP1          | F         | ACTGCCACACCTCCAGTCATT    |
|               | R         | CTTTGCCTCACTCAGGATTGG    |
| PGC1 $\alpha$ | F         | GATGGCACGCAGCCCTAT       |
|               | R         | CTCGACACGGAGAGTTAAAGGAA  |
| CIDEA         | F         | TGCTCTTCTGTATCGCCCAGT    |
|               | R         | GCCGTGTTAAGGAATCTGCTG    |
| DIO2          | F         | TGTGGTGCACGTCTCCAATC     |
|               | R         | GCCCCATCAGCGGTCTT        |
| PRDM16        | F         | CAGCACGGTGAAGCCATTC      |
|               | R         | GCGTGCATCCGCTTGTG        |
| ADRB3         | F         | ACGCCGAGACTACAGACCATA    |
|               | R         | CTGGTGGCATTACGAGGA       |
| ATF4          | F         | CCTGAACAGCGAAGTGTTGG     |
|               | R         | TGGAGAACCCATGAGGTTTCAA   |
| TRB3          | F         | TGTCTTGCGCGACCTCAA       |
|               | R         | CCAGCTTCGTCCTCTCACAGT    |
| GAPDH         | F         | TGTGTCCGTCGTGGATCTGA     |
|               | R         | CCTGCTTCACCACCTTCTTGAT   |
| ATF3          | F         | GAGGATTTTGCTAACCTGACACC  |
|               | R         | TTGACGGTAACTGACTCCAGC    |
| GADD34        | F         | AGGACCCCGAGATTCCTCTA     |
|               | R         | AGGTAGGGACCCAGCTTCTC     |
| ATGL          | F         | GTGAAGCAGGTGCCAACATTATTG |
|               | R         | AAACACGAGTCAGGGAGATGCC   |
| IRE1 $\alpha$ | F         | CGCACATGGCAGGATCAGG      |
|               | R         | TGCCCACTGCCAGCTTCT       |
| CHOP          | F         | GGCCAACAGAGGTCACAC       |
|               | R         | CTTCATGCGTTGCTTCCCA      |
| BIP           | F         | ACTTGGGGACCACCTATTCT     |

|       |   |                         |
|-------|---|-------------------------|
|       | R | ATCGCCAATCAGACGCTCC     |
| XBP1u | F | AGCAGCAAGTGGTGGATTTG    |
|       | R | GAGTTTTCTCCCGTAAAAGCTGA |
| XBP1s | F | ACACGCTTGGGAATGGACAC    |
|       | R | CCATGGGAAGATGTTCTGGG    |
| ATF6  | F | CGGTCCACAGACTCGTGTC     |
|       | R | GCTGTCGCCATATAAGGAAAGG  |
